# Supplementary material for: A Comparative Study of Machine Learning Model for Early Detection of Heart Failure in Bangladesh: Reducing Disease Burden and Improving Healthcare Services through Data-Driven Knowledge
Source: Research Square preprint supplement (doi:10.21203/rs.3.rs-7532602/v1), 2025-10-22
Supplement: Supplementary file 1 [file ff7757d606de428521a512a3.xlsx]

## Sheet: Coding Topics
SL No:	Topics	Difficulty Level
1	Language Fundamentals	Very Easy	Easy	Medium	Hard	Very Hard	Expert
2	Control Flow	Very Easy
3	Loops	Very Easy
4	Conditions
5	Maths
6	Numbers
7	Strings
8	Arrays
9	Formatting
10	Logic
11	Bug Fixes
12	Validation
13	Algorithms
14	Sorting
15	Data Structures
16	Recursion
17	Objects
18	Classes
19	Scope
20	Bit Operations
21	Higher Order Functions
22	Functional Programming
23	Geometry
24	Physics
25	Games
26	Dates
27	Regex
28	Cryptography
29	Closures
30	Interview

## Sheet: Aug 25
Date	Code Time	Problem No:	Walking (km)	Workout (hr)	Calories Burned	Speaking (hr)	Fapped		Today Total		Daily Goal (hr)		G. Total
2025-08-01	0	0	0	0.33	340	0.25	4		1		1.03571		0	Hours
2025-08-02	0	1	2	0	350	0	0	min to hr
2025-08-03	0	0	0	0	0	0	0	0.25
2025-08-04
2025-08-05									Days Remaining		Remaining Hours		Monthly Goal
2025-08-06									28		29		30 Hours
2025-08-07
2025-08-08									Total Hours		Completed %
2025-08-09									0		0
2025-08-10
2025-08-11
2025-08-12
2025-08-13									Total Problems				Harvard CS50’s Introduction to Programming with Python – Full University Course
2025-08-14									1
2025-08-15															Completed time (hrs)		Total time (hrs)
2025-08-16															2		16
2025-08-17									Daily Calories Burning Requirement
2025-08-18									528.929
2025-08-19
2025-08-20
2025-08-21
2025-08-22											Monthly Programming Time Dashboard
2025-08-23
2025-08-24
2025-08-25
2025-08-26
2025-08-27
2025-08-28
2025-08-29
2025-08-30
2025-08-31
Total Hours	0	1	2	0.33	690	0.25	4
			Total Calories Required to Burn		14810

## Sheet: July 25
Date	Code Time	Problem No:	Walking (km)	Workout (hr)	Calories Burned	Speaking (hr)	Fapped		Today Total		Daily Goal (hr)		G. Total
2025-07-01	1.5	3	2	0		0	0		1		1.04545		18.5	Hours
2025-07-02	0	0	2	0		0	0	min to hr
2025-07-03	0	0	5	0		0	0	0.25
2025-07-04	1.5	3	0	0.5		0.3	0
2025-07-05	0.5	2	5	0		0.5	1		Days Remaining		Remaining Hours		Monthly Goal
2025-07-06	1	2	10	0.5		1	0		11		11.5		30 Hours
2025-07-07	1	2	2	0		1	0
2025-07-08	1.5	6	2	0		1	0		Total Hours		Completed %
2025-07-09	0	0	3	0		0	0		18.5		61.6667
2025-07-10	1	5	7	0		0	0
2025-07-11	0	0	5	0		0	1
2025-07-12	1	4	2	0.33		0	0
2025-07-13	1	4	2	0		1	0		Total Problems				Harvard CS50’s Introduction to Programming with Python – Full University Course
2025-07-14	0.5	2	2	0		0	0		61
2025-07-15	0	0	0	0.5		1	3								Completed time (hrs)		Total time (hrs)
2025-07-16	1	6	2	0		1	0								2		16
2025-07-17	0.5	3	2	0		0	0
2025-07-18	0	0	0	0		0	0
2025-07-19	1	3	2	0		0	0
2025-07-20	1	3	2	0.33		0	0
2025-07-21	1	3	6	0		0	0
2025-07-22	1	3	2	0		1	0				Monthly Programming Time Dashboard
2025-07-23	0	0	6	0		0.3	0
2025-07-24	0	0	2	0		0	0
2025-07-25	0	0	6	0		0	2
2025-07-26	0	0	0	0		0.3	0
2025-07-27	1	1	0	0.33		0	0
2025-07-28	1	3	2	0.25		0.25	0
2025-07-29	0.5	3	2	0		0	0
2025-07-30				0.33	280
2025-07-31
Total Hours	18.5	61	83	3.07	280	8.65	7

## Sheet: June 25
Date	Total Time	Problem No:		Today Total		Daily Goal (hr)		G. Total
2025-06-01	0.88	0		2		-30		60	Hours
2025-06-02	0	0
2025-06-03	0	0
2025-06-04	0	0
2025-06-05	0	0		Days Remaining		Remaining Hours		Monthly Goal
2025-06-06	0	0		1		-30		30 Hours
2025-06-07	0	0										Monthly Programming Time Dashboard
2025-06-08	2.5	0		Total Hours		Completed %
2025-06-09	0	0		30		200
2025-06-10	0	0
2025-06-11	0	0
2025-06-12	1	0
2025-06-13	0	0		Total Problems				Harvard CS50’s Introduction to Programming with Python – Full University Course
2025-06-14	1	0		32
2025-06-15	0.5	0								Completed time (hrs)		Total time (hrs)
2025-06-16	1	0								2		16
2025-06-17	0.9	0
2025-06-18	2.5	0
2025-06-19	1.5	0
2025-06-20	3.18	3
2025-06-21	3	3
2025-06-22	2.47	7
2025-06-23	0	0
2025-06-24	0.5	1
2025-06-25	1.5	3
2025-06-26	0	0
2025-06-27	1	3
2025-06-28	2	4
2025-06-29	2	4
2025-06-30	2.57	4
Total	30
